# Supplementary material for: Paraxial Mesoderm Is the Major Source of Lymphatic Endothelium
Source: PubMed Central journal article supplement (PMC6658618; doi:10.1016/j.devcel.2019.04.034), 2019-07-22
Supplement: mmc1.pdf [file mmc1.pdf]

**Developmental Cell, Volume 50**

**Supplemental Information**

**Paraxial Mesoderm Is the Major  
Source of Lymphatic Endothelium**

**Oliver A. Stone and Didier Y.R. Stainier**

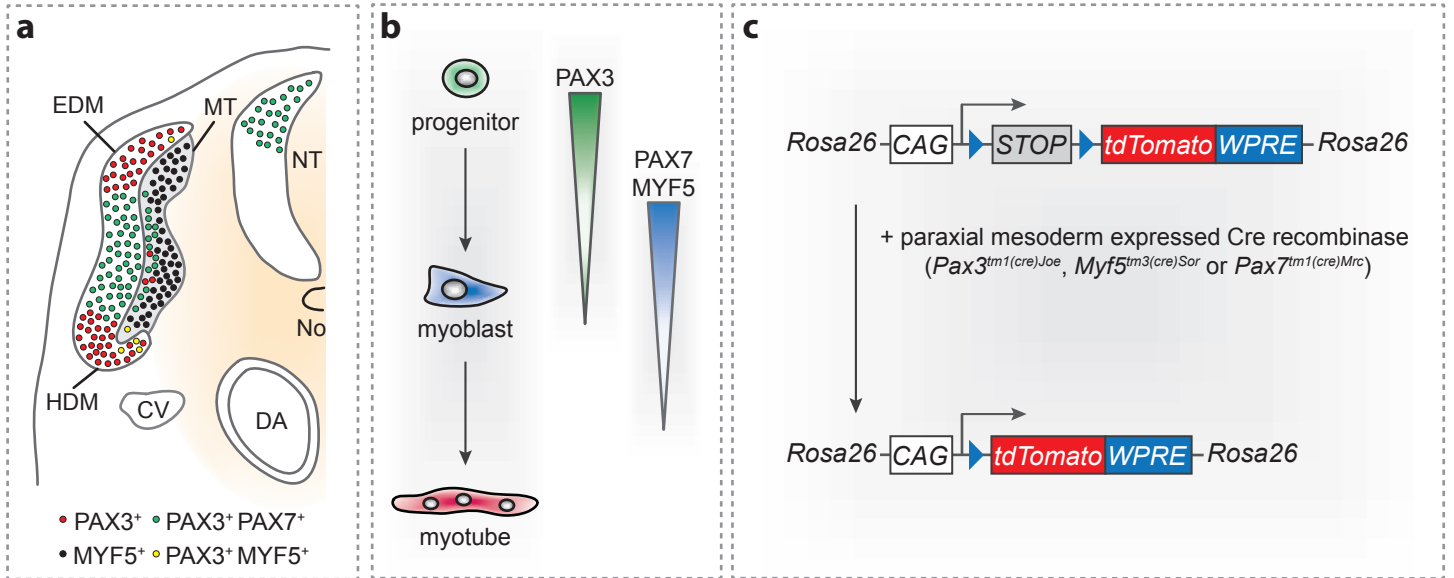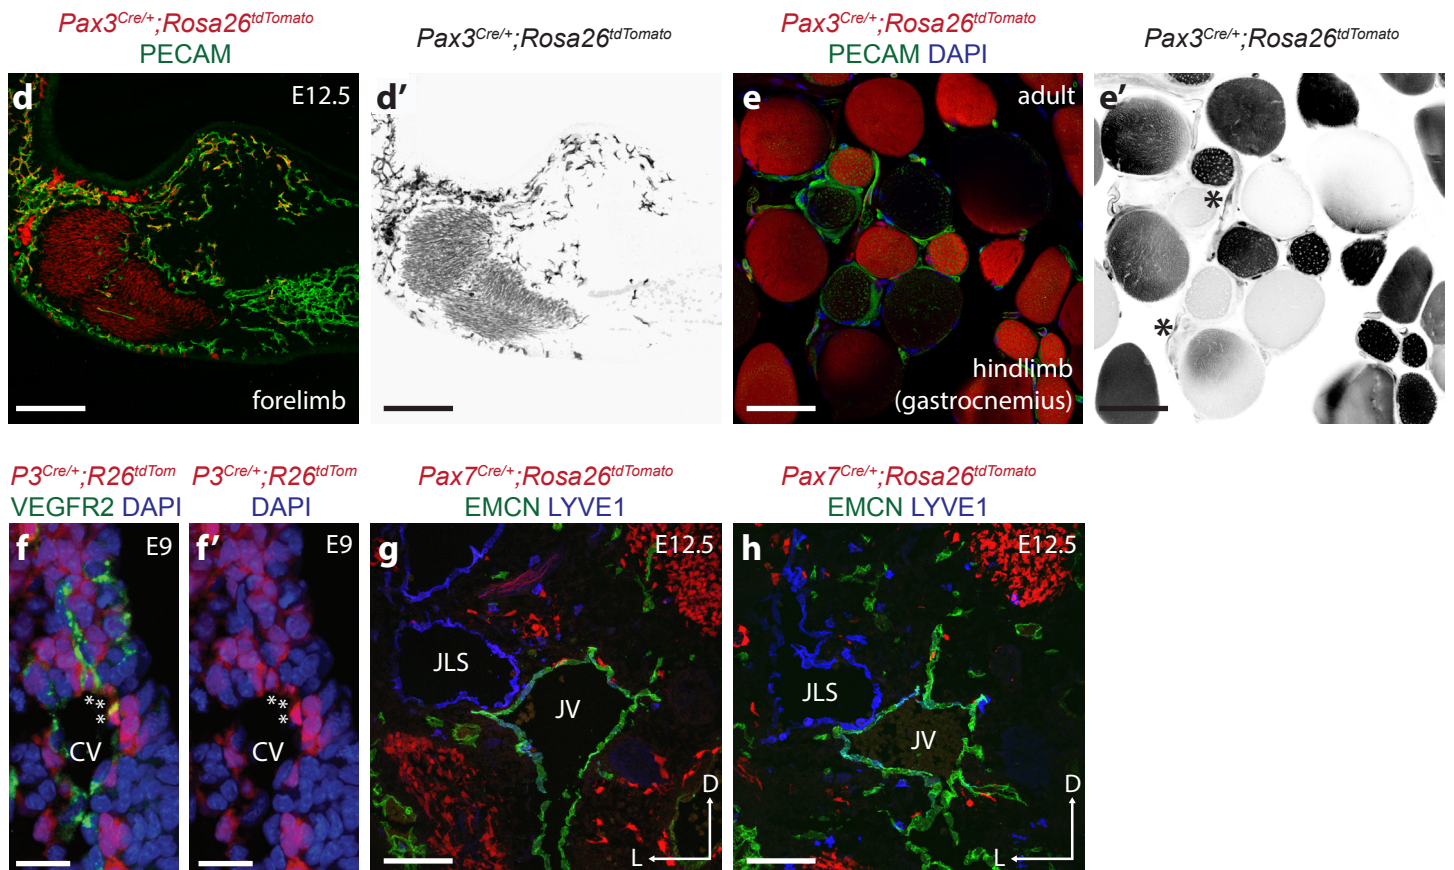

**Figure S1: Related to Figure 1. Analysis of paraxial mesodermal cell contribution to the developing vasculature.**

Schematic representations of the embryonic expression of PAX3, PAX7 and MYF5 in the developing dermomyotome, myotome and neural tube (neural crest) **(a)**, lineage commitment during embryonic myogenesis **(b)** and the strategy used to lineage trace cells from the paraxial mesoderm **(c)**. Immunofluorescence for tdTomato and PECAM on cryosections of embryonic *Pax3<sup>Cre/+</sup>;Rosa26<sup>tdtomato</sup>* forelimb **(d-d')** and tdTomato, PECAM and DAPI on cryosections of adult *Pax3<sup>Cre/+</sup>;Rosa26<sup>tdtomato</sup>* gastrocnemius **(e-e')**. **(f-f')** Immunofluorescence for tdTomato and VEGFR2 on transverse cryosections from a *Pax3<sup>Cre/+</sup>;Rosa26<sup>tdtomato</sup>* embryo. **(g, h)** Immunofluorescence for tdTomato, EMCN and LYVE1 on transverse cryosections from *Pax7<sup>Cre/+</sup>;Rosa26<sup>tdtomato</sup>* embryos. (CV - cardinal vein; DA - dorsal aorta; HDM - hypaxial dermomyotome; EDM - epaxial dermomyotome; MT - myotome; No - notochord; NT - neural tube; JLS - jugular lymph sac; JV - jugular vein). Scale bars: **d, d', g, h** – 100  $\mu\text{m}$ ; **e-f'** – 50  $\mu\text{m}$ .

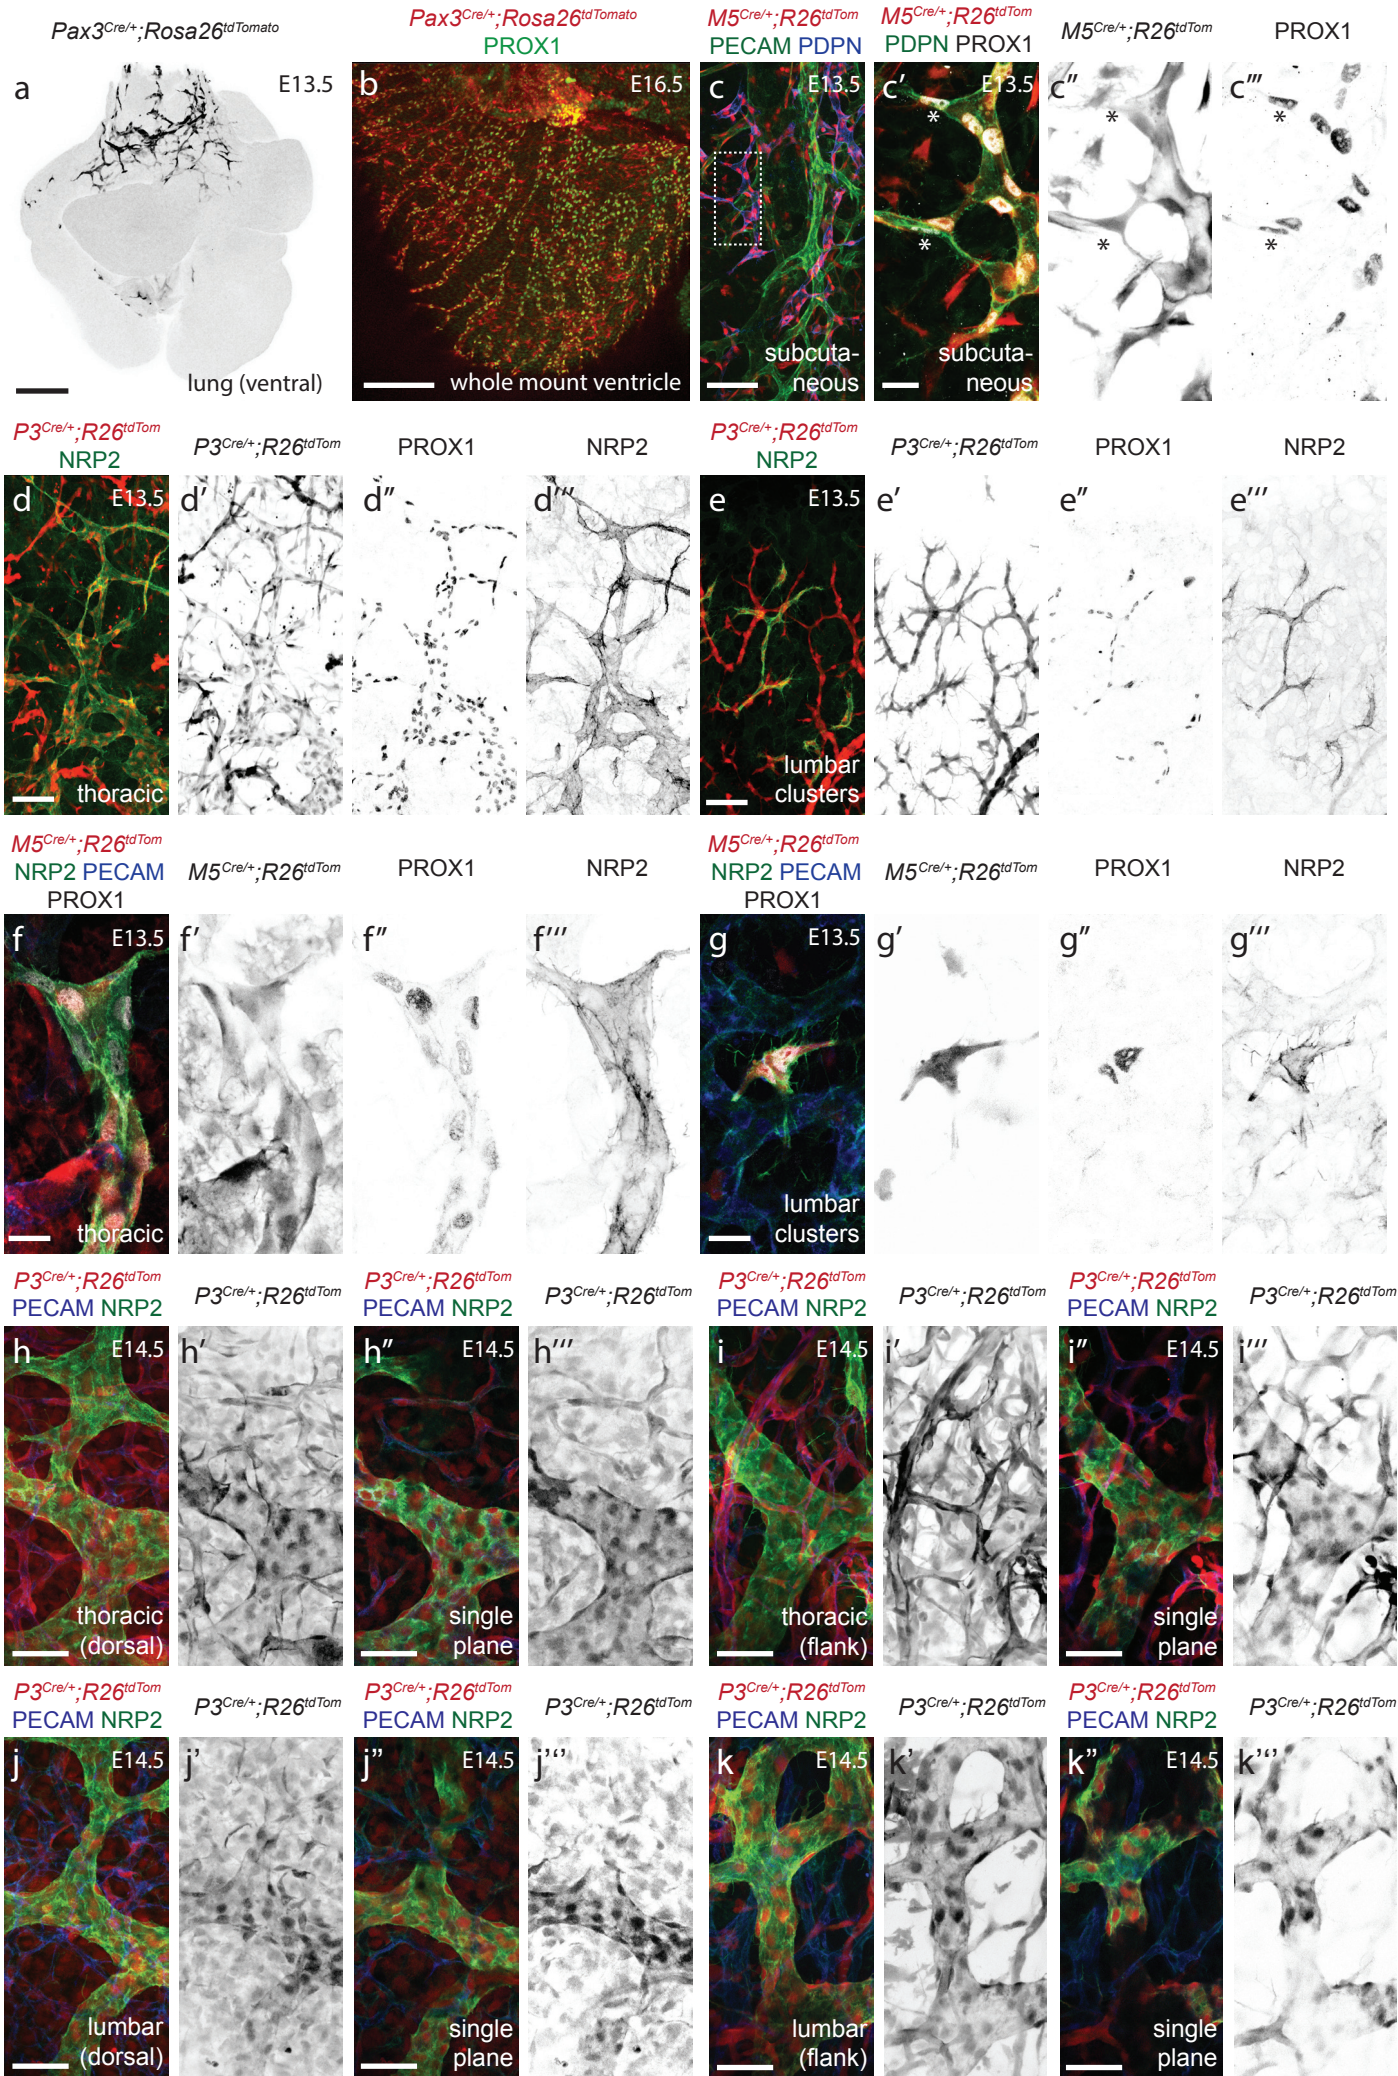

**Figure S2: Related to Figure 2. Paraxial mesodermal cells give rise to the subcutaneous and dermal lymphatics.**

(a) Representative confocal projection of *Pax3<sup>Cre/+</sup>;Rosa26<sup>tdtomato</sup>* whole mount embryonic lungs. (b) Representative confocal projection of a *Pax3<sup>Cre/+</sup>;Rosa26<sup>tdtomato</sup>* whole mount embryonic ventricle co-immunostained for PROX1. (c-c''') Immunofluorescence staining for tdTomato, PECAM, PDPN and PROX1 on a sagittal vibratome section at the level of the subcutaneous lymphatic network from a *Myf5<sup>Cre/+</sup>;Rosa26<sup>tdtomato</sup>* embryo. (d-e''') Immunofluorescence for tdTomato, NRP2 and PROX1 on whole mount embryonic skin from *Pax3<sup>Cre/+</sup>;Rosa26<sup>tdtomato</sup>* embryos at the indicated stage and locations. (f-g''') Immunofluorescence for tdTomato, NRP2 and PROX1 on whole mount embryonic skin from *Myf5<sup>Cre/+</sup>;Rosa26<sup>tdtomato</sup>* embryos at the indicated stage and locations. High resolution and single confocal plane images of immunofluorescence for tdTomato, PECAM and NRP2 on whole mount embryonic skin from *Pax3<sup>Cre/+</sup>;Rosa26<sup>tdtomato</sup>* embryos at the indicated stage and locations (h-k'''). Scale bars: a, b – 200  $\mu\text{m}$ ; c, d, e – 100  $\mu\text{m}$ ; c'-c''', f, g – 20  $\mu\text{m}$ ; h-k – 50  $\mu\text{m}$ .

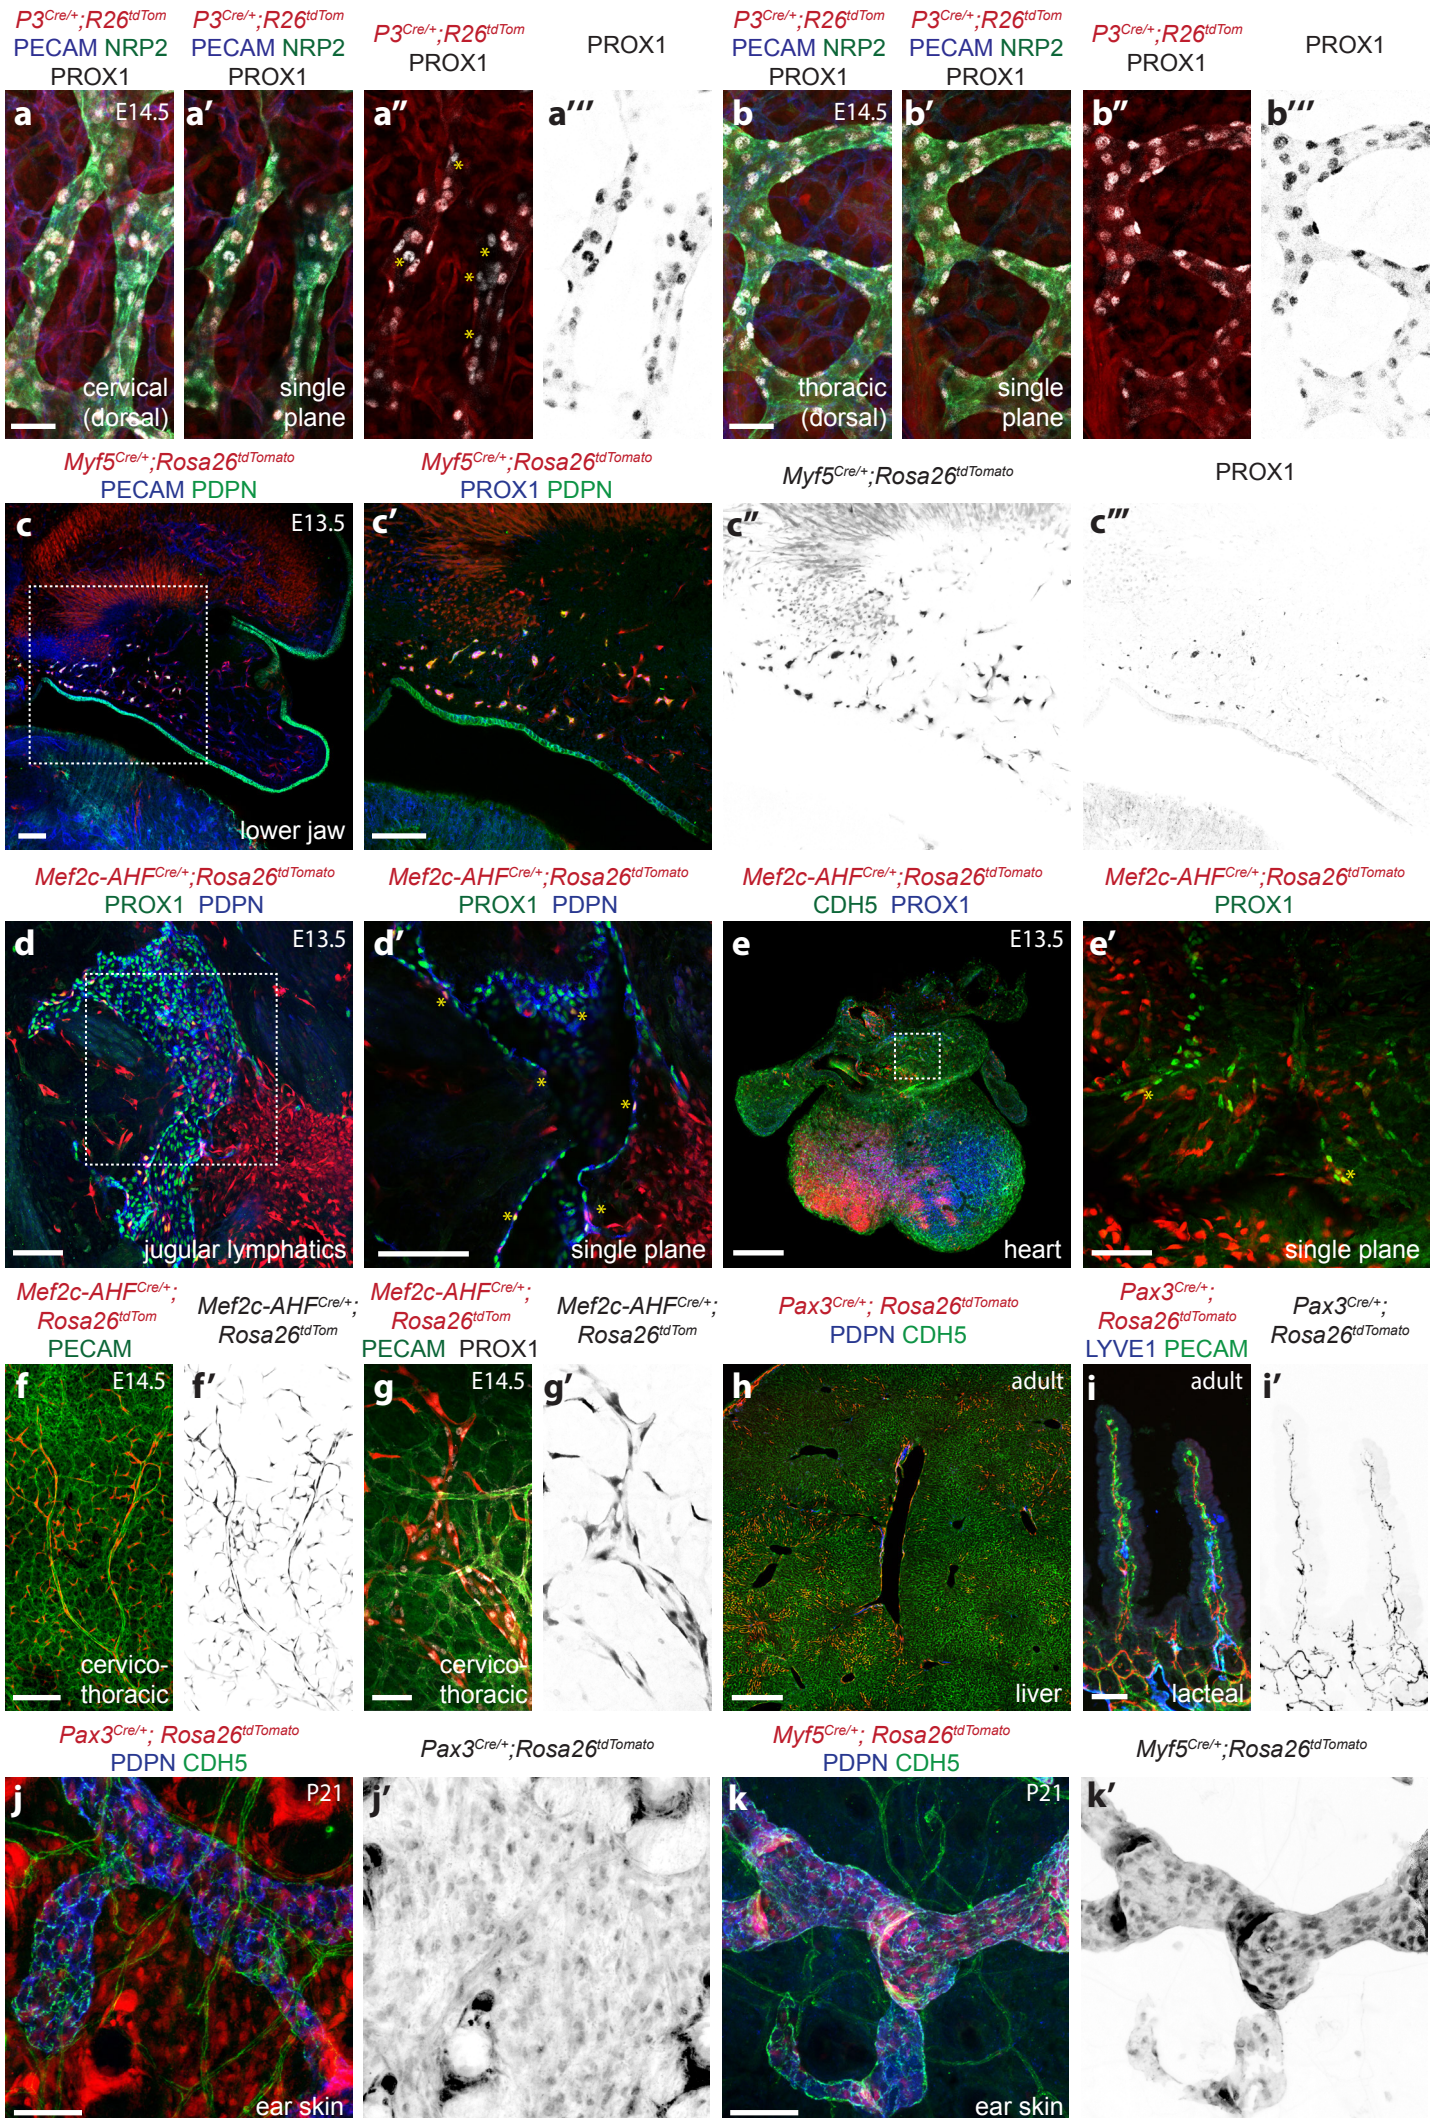

**Figure S3: Related to Figures 2 and 3. Contribution of multiple muscle progenitor populations to organ and tissue specific lymphatic vascular beds.**

(a-b'') Immunofluorescence for tdTomato, PECAM, NRP2 and PROX1 on whole mount embryonic skin from *Pax3<sup>Cre/+</sup>;Rosa26<sup>tdtomato</sup>* embryos at the indicated stage and locations . Yellow asterisks highlight PROX1<sup>+</sup> cells that are not labeled by *Pax3<sup>Cre/+</sup>;Rosa26<sup>tdtomato</sup>* in the cervical skin. (c-c'') Immunofluorescence for tdTomato, PECAM, PDPN and PROX1 on sagittal vibratome sections at the level of the lower jaw from *Myf5<sup>Cre/+</sup>;Rosa26<sup>tdTomato</sup>* embryos. (d-d') Immunofluorescence for tdTomato, PROX1 and PDPN on sagittal vibratome sections at the level of the jugular lymph sac from *Mef2c-AHF<sup>Cre/+</sup>;Rosa26<sup>tdTomato</sup>* embryos - yellow asterisks indicate LECs derived from the *Mef2c-AHF* lineage. (e-e') Representative confocal images of a *Mef2c-AHF<sup>Cre/+</sup>;Rosa26<sup>tdtomato</sup>* whole mount embryonic heart, co-immunostained for CDH5 and PROX1 - yellow asterisks indicate LECs derived from the *Mef2c-AHF* lineage. Immunofluorescence for tdTomato and PECAM (f-f'), and tdTomato, PECAM and PROX1 (g-g') on whole mount embryonic cervico-thoracic skin from *Mef2c-AHF<sup>Cre/+</sup>;Rosa26<sup>tdtomato</sup>* embryos. (h) Immunofluorescence for tdTomato, PDPN and CDH5 on cryosectioned liver tissue from an adult *Pax3<sup>Cre/+</sup>;Rosa26<sup>tdtomato</sup>* mouse. (i-i') Immunofluorescence for tdTomato, LYVE1 and PECAM on cryosectioned jejunum from an adult *Pax3<sup>Cre/+</sup>;Rosa26<sup>tdtomato</sup>* mouse. Immunofluorescence for tdTomato, PDPN and CDH5 on whole mount ear skin from *Pax3<sup>Cre/+</sup>;Rosa26<sup>tdtomato</sup>* (j, j') or *Myf5<sup>Cre/+</sup>;Rosa26<sup>tdtomato</sup>* (k, k') mice at post-natal day 21. Scale bars: a-c'', e', g-g' – 50 µm; d-d', g-g', i-i', j-k' – 100 µm; e – 1 mm; f-f' – 200 µm; h – 500 µm.

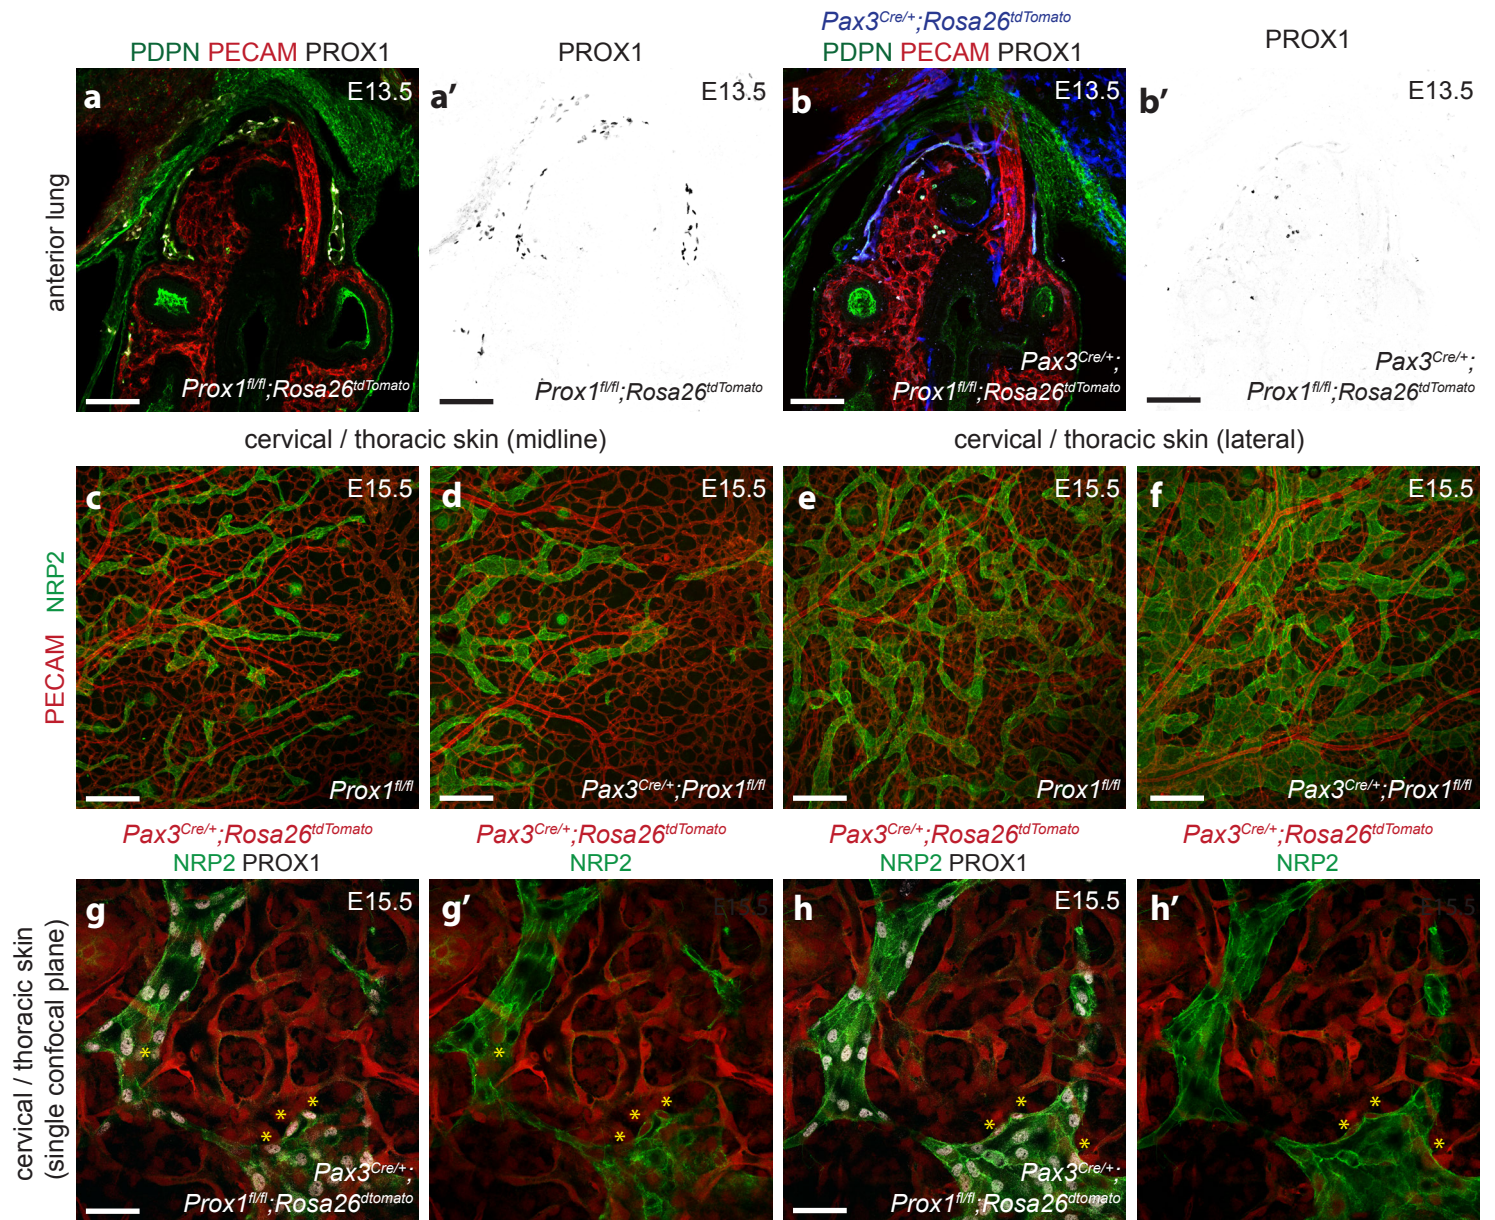



**Figure S4: Related to Figure 4. Analysis of *Prox1* deletion in the paraxial mesoderm derived cells.**

Immunofluorescence for tdTomato, PDPN, PECAM and PROX1 on sagittal vibratome sections at the level of the cardiac outflow tract from *Prox1<sup>fl/fl</sup>;Rosa26<sup>tdTomato</sup>* (a-a') and *Pax3<sup>Cre/+</sup>;Prox1<sup>fl/fl</sup>;Rosa26<sup>tdTomato</sup>* embryos (b-b'). Immunofluorescence for PECAM and NRP2 on whole mount cervical/thoracic skin from *Prox1<sup>fl/fl</sup>* and *Pax3<sup>Cre/+</sup>;Prox1<sup>fl/fl</sup>* embryos, at midline (c-d) and lateral positions (e-f). Immunofluorescence for tdTomato, NRP2 and PROX1 on whole mount cervical/thoracic skin from *Pax3<sup>Cre/+</sup>;Prox1<sup>fl/fl</sup>* embryos (g-h') - yellow asterisks highlight PROX1<sup>+</sup> cells that are labeled by *Pax3<sup>Cre/+</sup>; Rosa26<sup>tdtomato</sup>* in the cervical/thoracic skin. Scale bars: a, b, d, e, l, m- 50 μm; c, l-m - 100 μm; h-k - 200 μm.
